# Supplementary material for: Barcoding Mullets (Mugilidae): Genetic Characterization of Exploited Species in Southern Peninsular India
Source: MDPI journal article supplement (doi:10.3390/d15121193), 2023-12-04
Supplement: s1 [file s1]

## Supplementary materials

**Supplementary Table S1.** Details of species, locations, GenBank accession numbers, and BIN ID (BOLD) for the mullet sequences included in the phylogenetic tree presented in Supplementary Figure S1. [Arabic numerals in “species group” number is the corresponding “species group” number designated in the phylogenetic tree; Supplementary Figure S1, # Topotypic sequences of the ‘type-species’]

| “Species Group” Number | Species Group Name                        | Location               | GenBank Accession Number | BIN (BOLD:) |
|------------------------|-------------------------------------------|------------------------|--------------------------|-------------|
| 1                      | <i>Rhinomugil corsula</i>                 | Myanmar                | JQ060622                 | ABV4537     |
| 1                      | <i>Rhinomugil corsula</i> (Hamilton 1822) | Assam, India           | JX105471 #               | ABV4537     |
| 1                      | <i>Rhinomugil corsula</i>                 | Bharuch Estuary, India | JX983483                 | ABV4537     |
| 1                      | <i>Rhinomugil corsula</i>                 | Bharuch Estuary, India | JX983482                 | ABV4537     |
| 1                      | <i>Rhinomugil corsula</i>                 | India                  | MG954363                 | ABV4537     |
| 1                      | <i>Rhinomugil corsula</i>                 | Bharuch Estuary, India | KF214305                 | ABV4537     |
| 1                      | <i>Rhinomugil corsula</i>                 | Andhra Pradesh, India  | MK560990                 | ABV4537     |
| 2                      | <i>Minimugil cascasia</i>                 | Bangladesh             | JQ060624 #               | ACA0696     |
| 2                      | <i>Minimugil cascasia</i>                 | Bangladesh             | MK572330 #               | ACA0696     |
| 3                      | <i>Mugil cf. cephalus</i>                 | Thuneri, India         | FJ384686                 | ADZ0803     |
| 3                      | <i>Mugil cf. cephalus</i>                 | Cochin, India          | MH394335                 | ADZ0803     |
| 3                      | <i>Mugil cf. cephalus</i>                 | Vellar, India          | MW137500                 | ADZ0803     |
| 3                      | <i>Mugil cf. cephalus*</i>                | Poyya, Kerala, India   | MN728324                 | ADZ0803     |
| 3                      | <i>Mugil cf. cephalus*</i>                | Poyya, Kerala, India   | MN728326                 | ADZ0803     |
| 3                      | <i>Mugil cf. cephalus*</i>                | Kattampally, India     | MN728327                 | ADZ0803     |
| 3                      | <i>Mugil cf. cephalus*</i>                | Vellar, India          | MW137496                 | ADZ0803     |
| 3                      | <i>Mugil cf. cephalus*</i>                | Vellar, India          | MW137497                 | ADZ0803     |
| 3                      | <i>Mugil cf. cephalus*</i>                | Vellar, India          | MW137499                 | ADZ0803     |
| 3                      | <i>Mugil cf. cephalus*</i>                | Cochin, India          | MW137495                 | ADZ0803     |
| 3                      | <i>Mugil cf. cephalus*</i>                | Cochin, India          | MW137494                 | ADZ0803     |
| 3                      | <i>Mugil cf. cephalus*</i>                | Vellar, India          | MW137498                 | ADZ0803     |
| 3                      | <i>Mugil cf. cephalus*</i>                | Korapuzha, India       | MN728325                 | ADZ0803     |
| 4                      | <i>Mugil sp. L</i>                        | Taiwan                 | JQ060541                 | AAA7839     |
| 4                      | <i>Mugil sp. L</i>                        | New Caledonia          | JQ060571                 | AAA7839     |
| 4                      | <i>Mugil sp. L</i>                        | New Caledonia          | JQ072904                 | AAA7839     |
| 4                      | <i>Mugil sp. L</i>                        | New Caledonia          | JQ060570                 | AAA7839     |
| 4                      | <i>Mugil sp. L</i>                        | New Caledonia          | JQ060569                 | AAA7839     |
| 4                      | <i>Mugil sp. L</i>                        | New Caledonia          | JQ060566                 | AAA7839     |
| 4                      | <i>Mugil sp. L</i>                        | New Caledonia          | JQ060568                 | AAA7839     |
| 4                      | <i>Mugil sp. L</i>                        | Fiji                   | JQ060567                 | AAA7839     |
| 4                      | <i>Mugil sp. L</i>                        | Vietnam                | KT189060                 | AAA7839     |
| 4                      | <i>Mugil sp. L</i>                        | Vietnam                | KT189133                 | AAA7839     |
| 5                      | <i>Mugil sp. I</i>                        | India                  | KT347598                 | ACE4593     |
| 5                      | <i>Mugil sp. I</i>                        | India                  | KT347596                 | ACE4593     |
| 5                      | <i>Mugil sp. I</i>                        | India                  | KT347597                 | ACE4593     |
| 5                      | <i>Mugil sp. I</i>                        | Taiwan                 | JQ060539                 | ACE4593     |

|    |                                            |                       |            |         |
|----|--------------------------------------------|-----------------------|------------|---------|
| 5  | <i>Mugil</i> sp. I                         | Taiwan                | JQ060552   | ACE4593 |
| 5  | <i>Mugil</i> sp. I                         | Vietnam               | KT189099   | ACE4593 |
| 5  | <i>Mugil</i> sp. I                         | Vietnam               | KT189130   | ACE4593 |
| 5  | <i>Mugil</i> sp. I                         | China                 | JQ060553   | ACE4593 |
| 5  | <i>Mugil</i> sp. I                         | Kagoshima, Japan      | JQ060557   | ACE4593 |
| 5  | <i>Mugil</i> sp. I                         | Vietnam               | KT189081   | ACE4593 |
| 6  | <i>Mugil</i> sp. C                         | Unknown               | GU260677   | ACE3795 |
| 6  | <i>Mugil</i> sp. C                         | Unknown               | GU260678   | ACE3795 |
| 6  | <i>Mugil</i> sp. C                         | Taiwan                | JQ060540   | ACE3795 |
| 6  | <i>Mugil</i> sp. C                         | Shanghai, China       | MF122534   | ACE3795 |
| 6  | <i>Mugil</i> sp. C                         | Shanghai, China       | MF122535   | ACE3795 |
| 6  | <i>Mugil</i> sp. C                         | Vietnam               | KT189047   | ACE3795 |
| 6  | <i>Mugil</i> sp. C                         | Vietnam               | KT189048   | ACE3795 |
| 6  | <i>Mugil</i> sp. C                         | Vietnam               | KT189049   | ACE3795 |
| 7  | <i>Mugil cephalus</i> sensu str.           | Israel                | KY683176 # | ACE3807 |
| 7  | <i>Mugil cephalus</i> sensu str.           | Tunisia, North Africa | JQ060532 # | ACE3807 |
| 7  | <i>Mugil cephalus</i> sensu str.           | Morocco               | JQ060534 # | ACE3807 |
| 7  | <i>Mugil cephalus</i> sensu str.           | Martigues, France     | JQ060533 # | ACE3807 |
| 7  | <i>Mugil cephalus</i> sensu str.           | Morocco               | JQ060529 # | ACE3807 |
| 8  | <i>Crenimugil</i> sp. C                    | Vella Estuary, India  | JQ045781   | AAC4147 |
| 8  | <i>Crenimugil</i> sp. C                    | East Australia        | EF609494   | AAC4147 |
| 8  | <i>Crenimugil</i> sp. C                    | Vietnam               | JQ060635   | AAC4147 |
| 9  | <i>Crenimugil buehneri</i>                 | Thuneri, India        | FJ384690   | AAE3561 |
| 9  | <i>Crenimugil buehneri</i> *               | Vellar, India         | MW137481   | AAE3561 |
| 9  | <i>Crenimugil buehneri</i> *               | Vellar, India         | MW137480   | AAE3561 |
| 9  | <i>Crenimugil buehneri</i> *               | Vellar, India         | MW137482   | AAE3561 |
| 9  | <i>Crenimugil buehneri</i>                 | New Caledonia         | JQ060627   | AAE3561 |
| 10 | <i>Crenimugil crenilabis</i>               | Gambier               | JQ060435   | AAC4149 |
| 11 | <i>Crenimugil</i> sp. B                    | New Caledonia         | JQ060515   | AAG6597 |
| 11 | <i>Crenimugil</i> sp. B                    | Israel                | MF123838   | AAG6597 |
| 12 | <i>Crenimugil</i> cf. <i>seheli</i> sp. B  | India                 | LT669929   | AAG6597 |
| 12 | <i>Crenimugil</i> cf. <i>seheli</i> sp. B* | Cochin, India         | MW137486   | AAG6597 |
| 12 | <i>Crenimugil</i> cf. <i>seheli</i> sp. B* | Munambam, India       | MN728320   | AAG6597 |
| 12 | <i>Crenimugil</i> cf. <i>seheli</i> sp. B  | Cochin, India         | MH394340   | AAG6597 |
| 12 | <i>Crenimugil</i> cf. <i>seheli</i> sp. B  | Cochin, India         | MH394339   | AAG6597 |
| 13 | <i>Crenimugil</i> cf. <i>seheli</i> sp A*  | Muthalapozhi, India   | MN728321   | ADL4893 |
| 13 | <i>Crenimugil</i> cf. <i>seheli</i> sp A*  | Muthalapozhi, India   | MN728322   | ADL4893 |
| 13 | <i>Crenimugil</i> cf. <i>seheli</i> sp A   | Oman                  | JQ060522   | ADL4893 |
| 13 | <i>Crenimugil</i> cf. <i>seheli</i> sp A   | Red Sea               | MH331802#  | ADL4893 |
| 14 | <i>Crenimugil</i> sp. D                    | Fiji                  | JQ060637   | ACC0610 |
| 15 | <i>Osteomugil</i> sp. C                    | India                 | EU014262   | AAE6698 |
| 15 | <i>Osteomugil</i> sp. C                    | Vellar, India         | JQ045776   | AAE6698 |
| 15 | <i>Osteomugil</i> sp. C                    | India                 | EU014264   | AAE6698 |
| 15 | <i>Osteomugil</i> sp. C                    | India                 | EU014265   | AAE6698 |
| 15 | <i>Osteomugil</i> sp. C                    | India                 | EU014263   | AAE6698 |
| 15 | <i>Osteomugil</i> sp. C                    | West Bengal, India    | KX977549   | AAE6698 |

|    |                                                 |                           |            |         |
|----|-------------------------------------------------|---------------------------|------------|---------|
| 16 | <i>Osteomugil</i> sp. B                         | East Southern Africa      | JQ060498   | AAC4146 |
| 17 | <i>Osteomugil cunnesius</i> (Valenciennes 1836) | Vellar, India             | JQ045777 # | AAD2032 |
| 17 | <i>Osteomugil cunnesius</i>                     | South China Sea           | EU595339   | AAD2032 |
| 17 | <i>Osteomugil cunnesius</i>                     | South China Sea           | LC484868   | AAD2032 |
| 17 | <i>Osteomugil cunnesius</i>                     | Taiwan                    | JQ060497   | AAD2032 |
| 17 | <i>Osteomugil cunnesius</i>                     | Vietnam                   | JQ060499   | AAD2032 |
| 18 | <i>Osteomugil</i> cf. <i>perusii</i>            | Kakinada, India           | FJ265851   | AEZ8463 |
| 18 | <i>Osteomugil</i> cf. <i>perusii</i>            | Vellar, India             | JQ045779   | AEZ8463 |
| 18 | <i>Osteomugil</i> cf. <i>perusii</i>            | India                     | MF405730   | AAW7354 |
| 18 | <i>Osteomugil</i> cf. <i>perusii</i>            | Cochin, India             | MH394338   | AAW7354 |
| 18 | <i>Osteomugil</i> cf. <i>perusii</i>            | Ashtamudi, India          | MN728329   | AAW7354 |
| 18 | <i>Osteomugil</i> cf. <i>perusii</i>            | Fort Kochi, Kerala, India | MN728331   | AAW7354 |
| 18 | <i>Osteomugil</i> cf. <i>perusii</i>            | Poyya, Kerala, India      | MN728330   | AAW7354 |
| 18 | <i>Osteomugil</i> cf. <i>perusii</i>            | India                     | KF010474   | AAW7354 |
| 18 | <i>Osteomugil</i> cf. <i>perusii</i>            | India                     | KF010475   | AAW7354 |
| 18 | <i>Osteomugil</i> cf. <i>perusii</i>            | Cochin, India             | MH394337   | AAW7354 |
| 18 | <i>Osteomugil</i> cf. <i>perusii</i>            | India                     | KF010478   | AAW7354 |
| 18 | <i>Osteomugil</i> cf. <i>perusii</i>            | India                     | KF010480   | AAW7354 |
| 18 | <i>Osteomugil</i> cf. <i>perusii</i>            | India                     | KF010477   | AAW7354 |
| 18 | <i>Osteomugil</i> cf. <i>perusii</i>            | India                     | KF010479   | AAW7354 |
| 18 | <i>Osteomugil</i> cf. <i>perusii</i>            | India                     | KF010476   | AAW7354 |
| 18 | <i>Osteomugil</i> cf. <i>perusii</i>            | India                     | KF010481   | AAW7354 |
| 18 | <i>Osteomugil</i> cf. <i>perusii</i>            | India                     | LT669925   | AAW7354 |
| 18 | <i>Osteomugil</i> cf. <i>perusii</i>            | Cochin, India             | MH394336   | AAW7354 |
| 18 | <i>Osteomugil</i> cf. <i>perusii</i>            | Madakkara, India          | MN728332   | AAW7354 |
| 18 | <i>Osteomugil</i> cf. <i>perusii</i>            | Tamil Nadu, India         | MK902724   | AAW7354 |
| 18 | <i>Osteomugil</i> cf. <i>perusii</i>            | India                     | KF010482   | AAW7354 |
| 18 | <i>Osteomugil</i> cf. <i>perusii</i>            | Sri Lanka                 | JQ060640   | AAW7354 |
| 18 | <i>Osteomugil</i> cf. <i>perusii</i>            | Philippines               | JQ060639   | AAW7354 |
| 19 | <i>Osteomugil perusii</i>                       | New Caledonia             | JQ060504   | ACC0135 |
| 20 | <i>Osteomugil</i> cf. <i>perusii</i>            | Taiwan                    | JQ060505   | ACC0061 |
| 21 | <i>Osteomugil</i> sp. A                         | West Australia            | JQ060496   | ACC0146 |
| 22 | <i>Osteomugil</i> sp. D                         | Yanam, India              | JX260972   | AAG3686 |
| 22 | <i>Osteomugil</i> sp. D                         | Tamil Nadu, India         | MN106715   | AAG3686 |
| 22 | <i>Osteomugil</i> sp. D                         | India                     | KX399441   | AAG3686 |
| 22 | <i>Osteomugil</i> sp. D*                        | Thrikkaripur, India       | MN728328   | AAG3686 |
| 22 | <i>Osteomugil</i> sp. D*                        | Vellar, India             | MW137514   | AAG3686 |
| 22 | <i>Osteomugil</i> sp. D*                        | Vellar, India             | MW137515   | AAG3686 |
| 22 | <i>Osteomugil</i> sp. D*                        | Vellar, India             | MW137516   | AAG3686 |
| 23 | <i>Osteomugil engeli</i> (Bleeker 1858)         | Hawaii                    | JQ060501   | AAF7188 |
| 24 | <i>Osteomugil robustus</i> (Günther 1861)       | East Southern Africa      | JQ060629   | AAG6596 |
| 25 | <i>Ellochelon</i> sp. A                         | Australia                 | JQ060443   | ACK7668 |
| 26 | <i>Ellochelon vaigiensis</i>                    | West Papua                | JQ060444 # | AAC9398 |
| 26 | <i>Ellochelon vaigiensis</i>                    | Tahiti                    | JQ060445   | AAC9398 |
| 27 | <i>Ellochelon</i> sp. B*                        | Vellar, India             | MW137487   | AAU0553 |
| 27 | <i>Ellochelon</i> sp. B*                        | Vellar, India             | MW137488   | AAU0553 |

|    |                                                  |                           |          |         |
|----|--------------------------------------------------|---------------------------|----------|---------|
| 27 | <i>Ellochelon</i> sp. B*                         | Vellar, India             | MW137489 | AAU0553 |
| 28 | <i>Plicomugil labiosus</i> (Valenciennes 1836) * | Agatti Island, India      | MN728323 | AAL9122 |
| 28 | <i>Plicomugil labiosus</i>                       | Taiwan                    | JQ060620 | AAL9122 |
| 29 | <i>Planiliza</i> sp. I                           | Myanmar                   | JQ060430 | ACC0311 |
| 29 | <i>Planiliza</i> sp. I                           | Bangladesh                | MK995096 | ACC0311 |
| 30 | <i>Planiliza melanoptera</i> (Valenciennes 1836) | Fiji                      | JQ060428 | AAD7507 |
| 31 | <i>Planiliza</i> sp. D                           | Arabian Sea, India        | FJ347895 | AAA7841 |
| 31 | <i>Planiliza</i> sp. D                           | Arabian Sea, India        | FJ347898 | AAA7841 |
| 31 | <i>Planiliza</i> sp. D                           | Arabian Sea, India        | FJ347896 | AAA7841 |
| 31 | <i>Planiliza</i> sp. D                           | Bharuch Estuary, India    | JX983368 | AAA7841 |
| 31 | <i>Planiliza</i> sp. D                           | India                     | KX399437 | AAA7841 |
| 31 | <i>Planiliza</i> sp. D*                          | Korapuzha, India          | MN728305 | AAA7841 |
| 31 | <i>Planiliza</i> sp. D*                          | Kayamkulam, India         | MN728313 | AAA7841 |
| 31 | <i>Planiliza</i> sp. D*                          | Fort Kochi, Kerala, India | MN728316 | AAA7841 |
| 31 | <i>Planiliza</i> sp. D*                          | Cochin, India             | MN728314 | AAA7841 |
| 31 | <i>Planiliza</i> sp. D*                          | Cochin, India             | MN728315 | AAA7841 |
| 31 | <i>Planiliza</i> sp. D*                          | Korapuzha, India          | MN728307 | AAA7841 |
| 31 | <i>Planiliza</i> sp. D                           | Arabian Sea, India        | FJ347897 | AAA7841 |
| 31 | <i>Planiliza</i> sp. D                           | Arabian Sea, India        | FJ347899 | AAA7841 |
| 31 | <i>Planiliza</i> sp. D                           | Bharuch Estuary, India    | JX983367 | AAA7841 |
| 31 | <i>Planiliza</i> sp. D*                          | Cochin, India             | MW137544 | AAA7841 |
| 31 | <i>Planiliza</i> sp. D*                          | Cochin, India             | MW137540 | AAA7841 |
| 31 | <i>Planiliza</i> sp. D                           | Bharuch Estuary, India    | JX983369 | AAA7841 |
| 31 | <i>Planiliza</i> sp. D                           | Sri Lanka                 | JQ060485 | AAA7841 |
| 31 | <i>Planiliza</i> sp. D*                          | Vellar, India             | MW137518 | AAA7841 |
| 31 | <i>Planiliza</i> sp. D*                          | Valapattanam, India       | MN728303 | AAA7841 |
| 31 | <i>Planiliza</i> sp. D*                          | Cheruvathur, India        | MN728302 | AAA7841 |
| 31 | <i>Planiliza</i> sp. D*                          | Thrikkaripur, India       | MN728306 | AAA7841 |
| 31 | <i>Planiliza</i> sp. D*                          | Korapuzha, India          | MN728308 | AAA7841 |
| 31 | <i>Planiliza</i> sp. D*                          | Edakochi, Kerala, India   | MN728309 | AAA7841 |
| 31 | <i>Planiliza</i> sp. D*                          | Korapuzha, India          | MN728311 | AAA7841 |
| 31 | <i>Planiliza</i> sp. D*                          | Kayamkulam, India         | MN728304 | AAA7841 |
| 31 | <i>Planiliza</i> sp. D*                          | Korapuzha, India          | MN728310 | AAA7841 |
| 31 | <i>Planiliza</i> sp. D*                          | Korapuzha, India          | MN728312 | AAA7841 |
| 31 | <i>Planiliza</i> sp. D*                          | Cochin India              | MW137535 | AAA7841 |
| 32 | <i>Planiliza</i> sp. D'                          | Vietnam                   | JQ060493 | ACJ0431 |
| 33 | <i>Planiliza</i> sp. B                           | West Bengal, India        | KX977547 | ABU7210 |
| 33 | <i>Planiliza</i> sp. B                           | Yanam, India              | JX260846 | ABU7210 |
| 33 | <i>Planiliza</i> sp. B                           | West Bengal, India        | KX977548 | ABU7210 |
| 33 | <i>Planiliza</i> sp. B                           | West Bengal, India        | KX977546 | ABU7210 |
| 33 | <i>Planiliza</i> sp. B                           | Indonesia                 | JQ060621 | ABU7210 |
| 33 | <i>Planiliza</i> sp. B                           | Malaysia                  | KX223926 | ABU7210 |
| 34 | <i>Planiliza</i> cf. <i>macrolepis</i> sp. H     | Thuneri, India            | FJ384677 | ACC0087 |
| 34 | <i>Planiliza</i> cf. <i>macrolepis</i> sp. H*    | Paravoor, Kerala, India   | MN728317 | ACC0087 |
| 34 | <i>Planiliza</i> cf. <i>macrolepis</i> sp. H*    | Cheliya, Kerala, India    | MN728319 | ACC0087 |
| 34 | <i>Planiliza</i> cf. <i>macrolepis</i> sp. H*    | Paravoor, Kerala, India   | MN728318 | ACC0087 |

|    |                                                 |                        |            |         |
|----|-------------------------------------------------|------------------------|------------|---------|
| 34 | <i>Planiliza cf. macrolepis</i> sp. H*          | Vellar, India          | MW137522   | ACC0087 |
| 34 | <i>Planiliza cf. macrolepis</i> sp. H*          | Vellar, India          | MW137524   | ACC0087 |
| 34 | <i>Planiliza cf. macrolepis</i> sp. H*          | Vellar, India          | MW137523   | ACC0087 |
| 34 | <i>Planiliza cf. macrolepis</i> sp. H*          | Vellar, India          | MW137525   | ACC0087 |
| 34 | <i>Planiliza cf. macrolepis</i> sp. H           | Cochin India           | MH394343   | ACC0087 |
| 34 | <i>Planiliza cf. macrolepis</i> sp. H           | Tamil Nadu, India      | MK902723   | ACC0087 |
| 34 | <i>Planiliza cf. macrolepis</i> sp. H           | Tamil Nadu, India      | MK962516   | ACC0087 |
| 34 | <i>Planiliza cf. macrolepis</i> sp. H           | Sri Lanka              | JQ060413   | ACC0087 |
| 34 | <i>Planiliza cf. macrolepis</i> sp. H           | Maldives               | JQ060424   | ACC0087 |
| 35 | <i>Planiliza</i> sp. H                          | Philippines            | JN021222   | AAC0697 |
| 35 | <i>Planiliza</i> sp. H                          | Japan                  | JQ060419   | AAC0697 |
| 35 | <i>Planiliza</i> sp. H                          | Taiwan                 | JQ060420   | AAC0697 |
| 36 | <i>Planiliza macrolepis</i>                     | South Africa           | JQ060425 # | AAC0696 |
| 36 | <i>Planiliza macrolepis</i>                     | Seychelles             | JQ060426   | AAC0696 |
| 37 | <i>Planiliza ordensis</i>                       | Australia              | JQ060449 # | ACC0375 |
| 37 | <i>Planiliza ordensis</i>                       | Australia              | JQ060450 # | ACC0375 |
| 38 | <i>Planiliza klunzingeri</i> (Day 1888)         | Bharuch Estuary, India | JX983356   | ABX8353 |
| 38 | <i>Planiliza klunzingeri</i>                    | Bharuch Estuary, India | JX983357   | ABX8353 |
| 38 | <i>Planiliza klunzingeri</i>                    | Bharuch Estuary, India | JX983355   | ABX8353 |
| 38 | <i>Planiliza klunzingeri</i>                    | Persian Gulf           | JQ060491   | ABX8353 |
| 39 | <i>Planiliza</i> sp. K                          | Bharuch Estuary, India | JX983495   | ABU8792 |
| 39 | <i>Planiliza</i> sp. K                          | Bharuch Estuary, India | JX983496   | ABU8792 |
| 40 | <i>Planiliza subviridis</i> (Valenciennes 1836) | Cochin, India          | EF609544   | AAC0695 |
| 40 | <i>Planiliza subviridis</i> *                   | Kattampally, India     | MN728299   | AAC0695 |
| 40 | <i>Planiliza subviridis</i>                     | Cochin India           | EF609545   | AAC0695 |
| 40 | <i>Planiliza subviridis</i>                     | Cochin, India          | EF609547   | AAC0695 |
| 40 | <i>Planiliza subviridis</i>                     | Cochin, India          | EF609546   | AAC0695 |
| 40 | <i>Planiliza subviridis</i>                     | Cochin, India          | MH394342   | AAC0695 |
| 40 | <i>Planiliza subviridis</i> *                   | Cochin, India          | MW137552   | AAC0695 |
| 40 | <i>Planiliza subviridis</i> *                   | Cheliya, Kerala, India | MN728291   | AAC0695 |
| 40 | <i>Planiliza subviridis</i>                     | Cochin, India          | FJ347967   | AAC0695 |
| 40 | <i>Planiliza subviridis</i>                     | Vellar, India          | JQ045785   | AAC0695 |
| 40 | <i>Planiliza subviridis</i>                     | West Bengal, India     | MG495936   | AAC0695 |
| 40 | <i>Planiliza subviridis</i>                     | Kakinada, India        | FJ265850   | AAC0695 |
| 40 | <i>Planiliza subviridis</i>                     | Laccadive Sea          | KT984272   | AAC0695 |
| 40 | <i>Planiliza subviridis</i>                     | India                  | MF380528   | AAC0695 |
| 40 | <i>Planiliza subviridis</i>                     | Cochin, India          | MH394341   | AAC0695 |
| 40 | <i>Planiliza subviridis</i> *                   | Kattampally, India     | MN728289 # | AAC0695 |
| 40 | <i>Planiliza subviridis</i> *                   | Kayamkulam, India      | MN728293   | AAC0695 |
| 40 | <i>Planiliza subviridis</i>                     | Cochin, India          | JN228383   | AAC0695 |
| 40 | <i>Planiliza subviridis</i> *                   | Vellar, India          | MW137549   | AAC0695 |
| 40 | <i>Planiliza subviridis</i>                     | India                  | KX399450   | AAC0695 |
| 40 | <i>Planiliza subviridis</i> *                   | Thrikkaripur, India    | MN728292   | AAC0695 |
| 40 | <i>Planiliza subviridis</i> *                   | Fort Kochi, India      | MN728297   | AAC0695 |
| 40 | <i>Planiliza subviridis</i> *                   | Korapuzha, India       | MN728294   | AAC0695 |
| 40 | <i>Planiliza subviridis</i> *                   | Thrikkaripur, India    | MN728296   | AAC0695 |

---

|    |                                 |                         |          |         |
|----|---------------------------------|-------------------------|----------|---------|
| 40 | <i>Planiliza subviridis*</i>    | Poyya, Kerala, India    | MN728298 | AAC0695 |
| 40 | <i>Planiliza subviridis*</i>    | Paravoor, Kerala, India | MN728295 | AAC0695 |
| 40 | <i>Planiliza subviridis*</i>    | Korapuzha, India        | MN728300 | AAC0695 |
| 40 | <i>Planiliza subviridis*</i>    | Kayamkulam, India       | MN728301 | AAC0695 |
| 40 | <i>Planiliza subviridis*</i>    | Varapuzha, India        | MN728290 | AAC0695 |
| 40 | <i>Planiliza subviridis*</i>    | Vellar, India           | MW137551 | AAC0695 |
| 40 | <i>Planiliza subviridis*</i>    | Vellar, India           | MW137566 | AAC0695 |
| 40 | <i>Planiliza subviridis*</i>    | Vellar, India           | MW137550 | AAC0695 |
| 40 | <i>Planiliza subviridis*</i>    | Vellar, India           | MW137546 | AAC0695 |
| 40 | <i>Planiliza subviridis*</i>    | Vellar, India           | MW137548 | AAC0695 |
| 40 | <i>Planiliza subviridis*</i>    | Vellar, India           | MW137547 | AAC0695 |
| 40 | <i>Planiliza subviridis*</i>    | Vellar, India           | MW137545 | AAC0695 |
| 40 | <i>Planiliza subviridis</i>     | Sri Lanka               | JQ060434 | AAC0695 |
| 41 | <i>Planiliza cf. subviridis</i> | Indonesia               | JQ060433 | ACC0823 |
| 42 | <i>Planiliza cf. subviridis</i> | Vellar, India           | JQ045780 | ABY5947 |
| 42 | <i>Planiliza cf. subviridis</i> | Vellar, India           | JQ045782 | ABY5947 |
| 42 | <i>Planiliza cf. subviridis</i> | Taiwan                  | JQ060432 | ABY5947 |
| 42 | <i>Planiliza cf. subviridis</i> | China                   | EF607446 | ABY5947 |

---

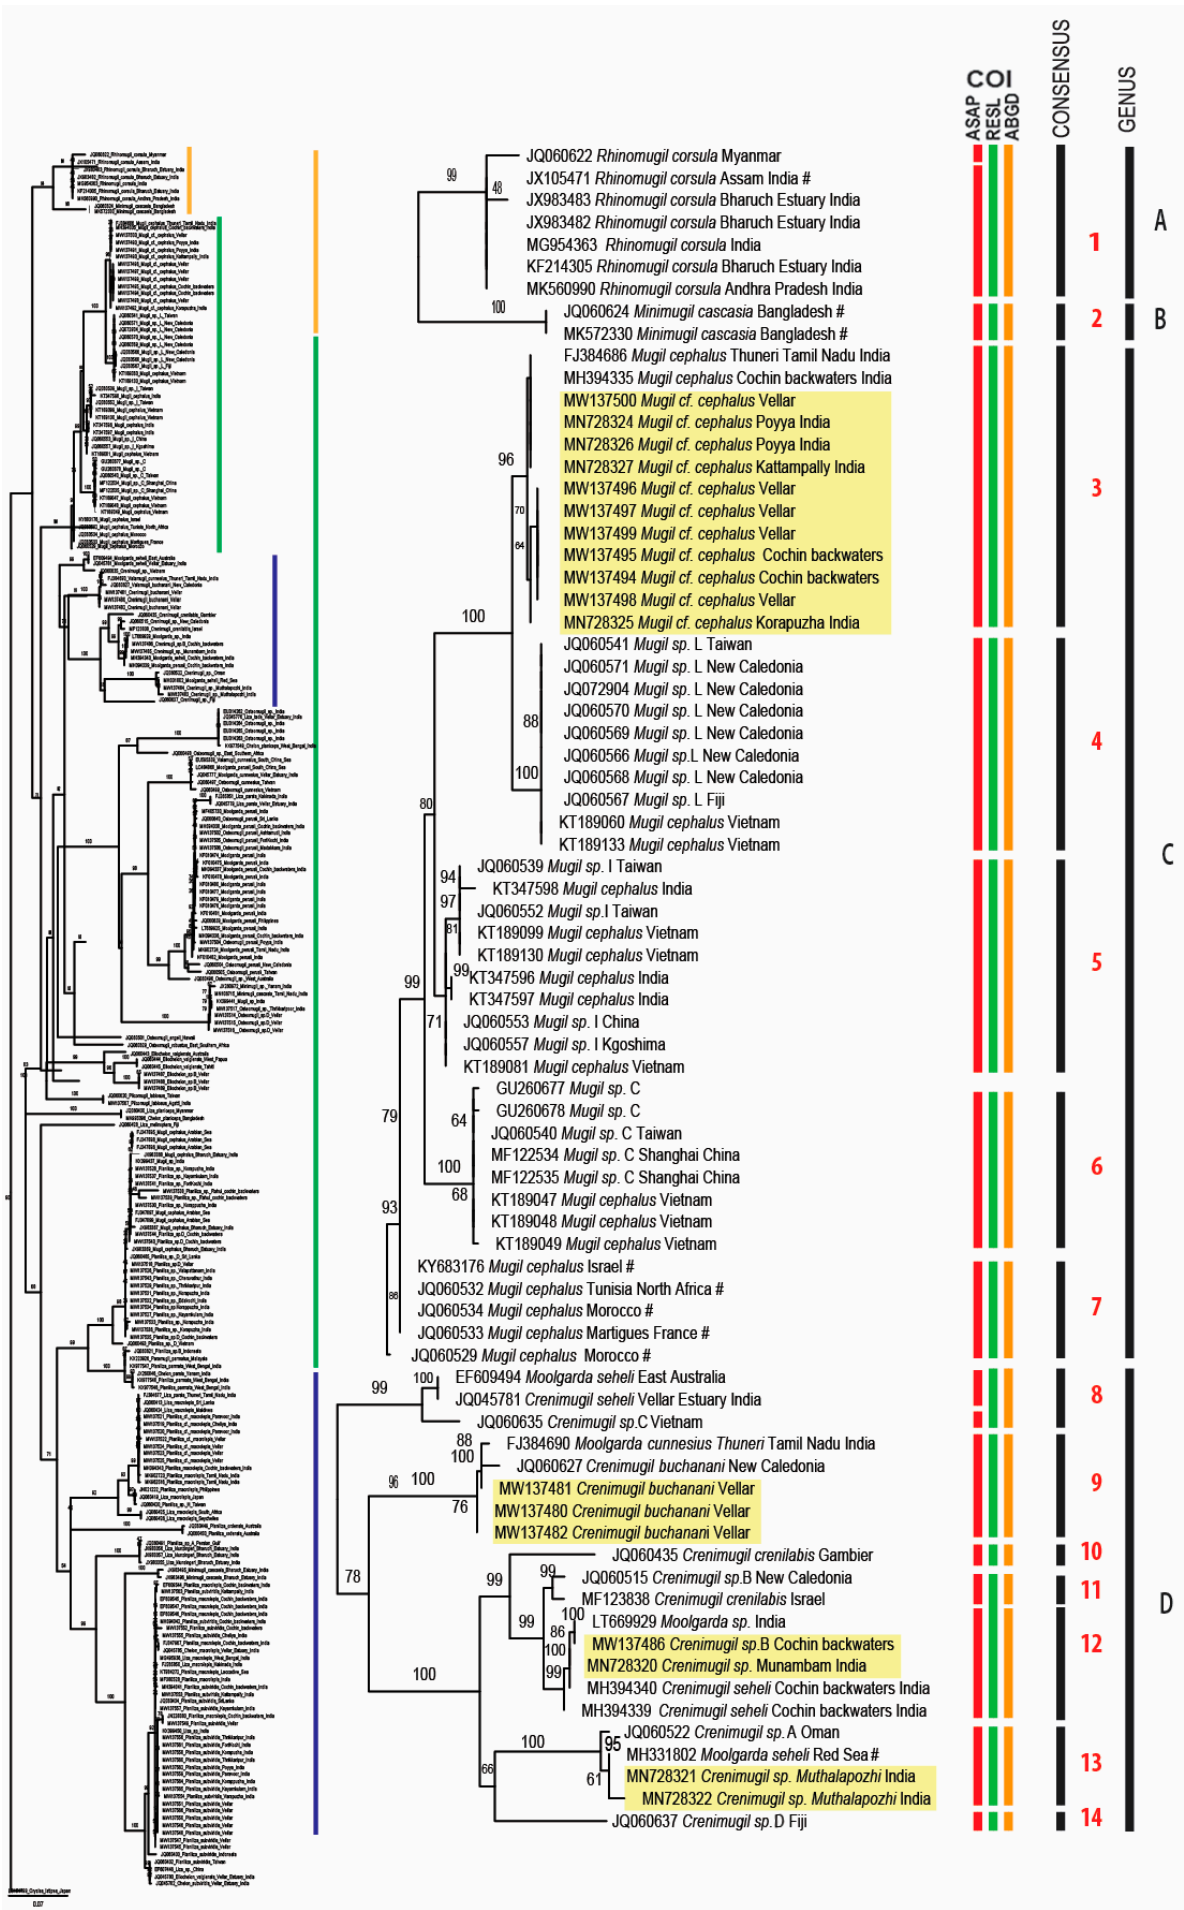

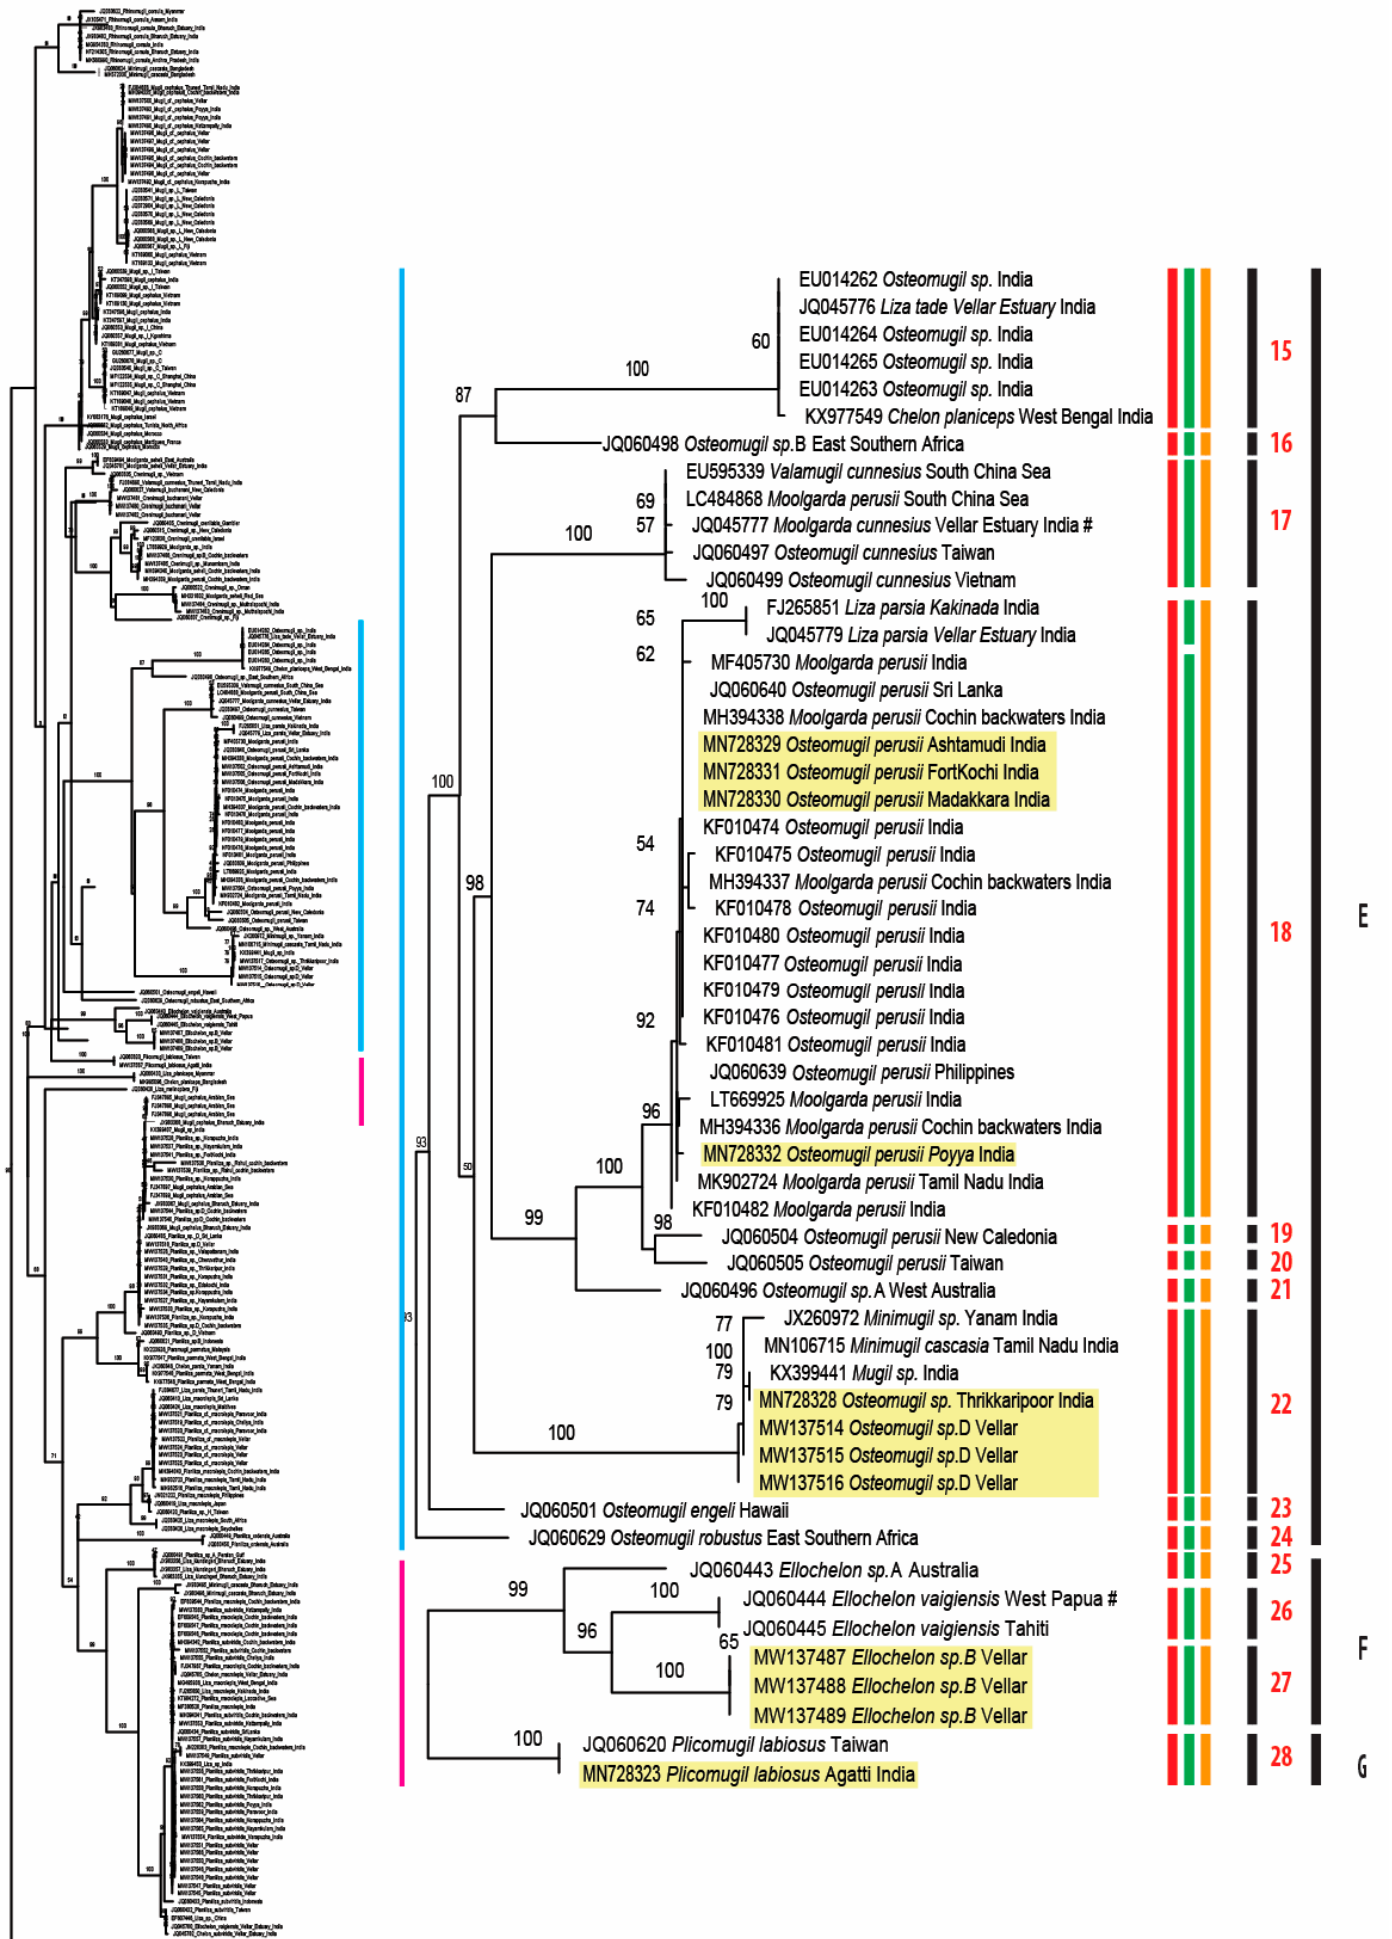



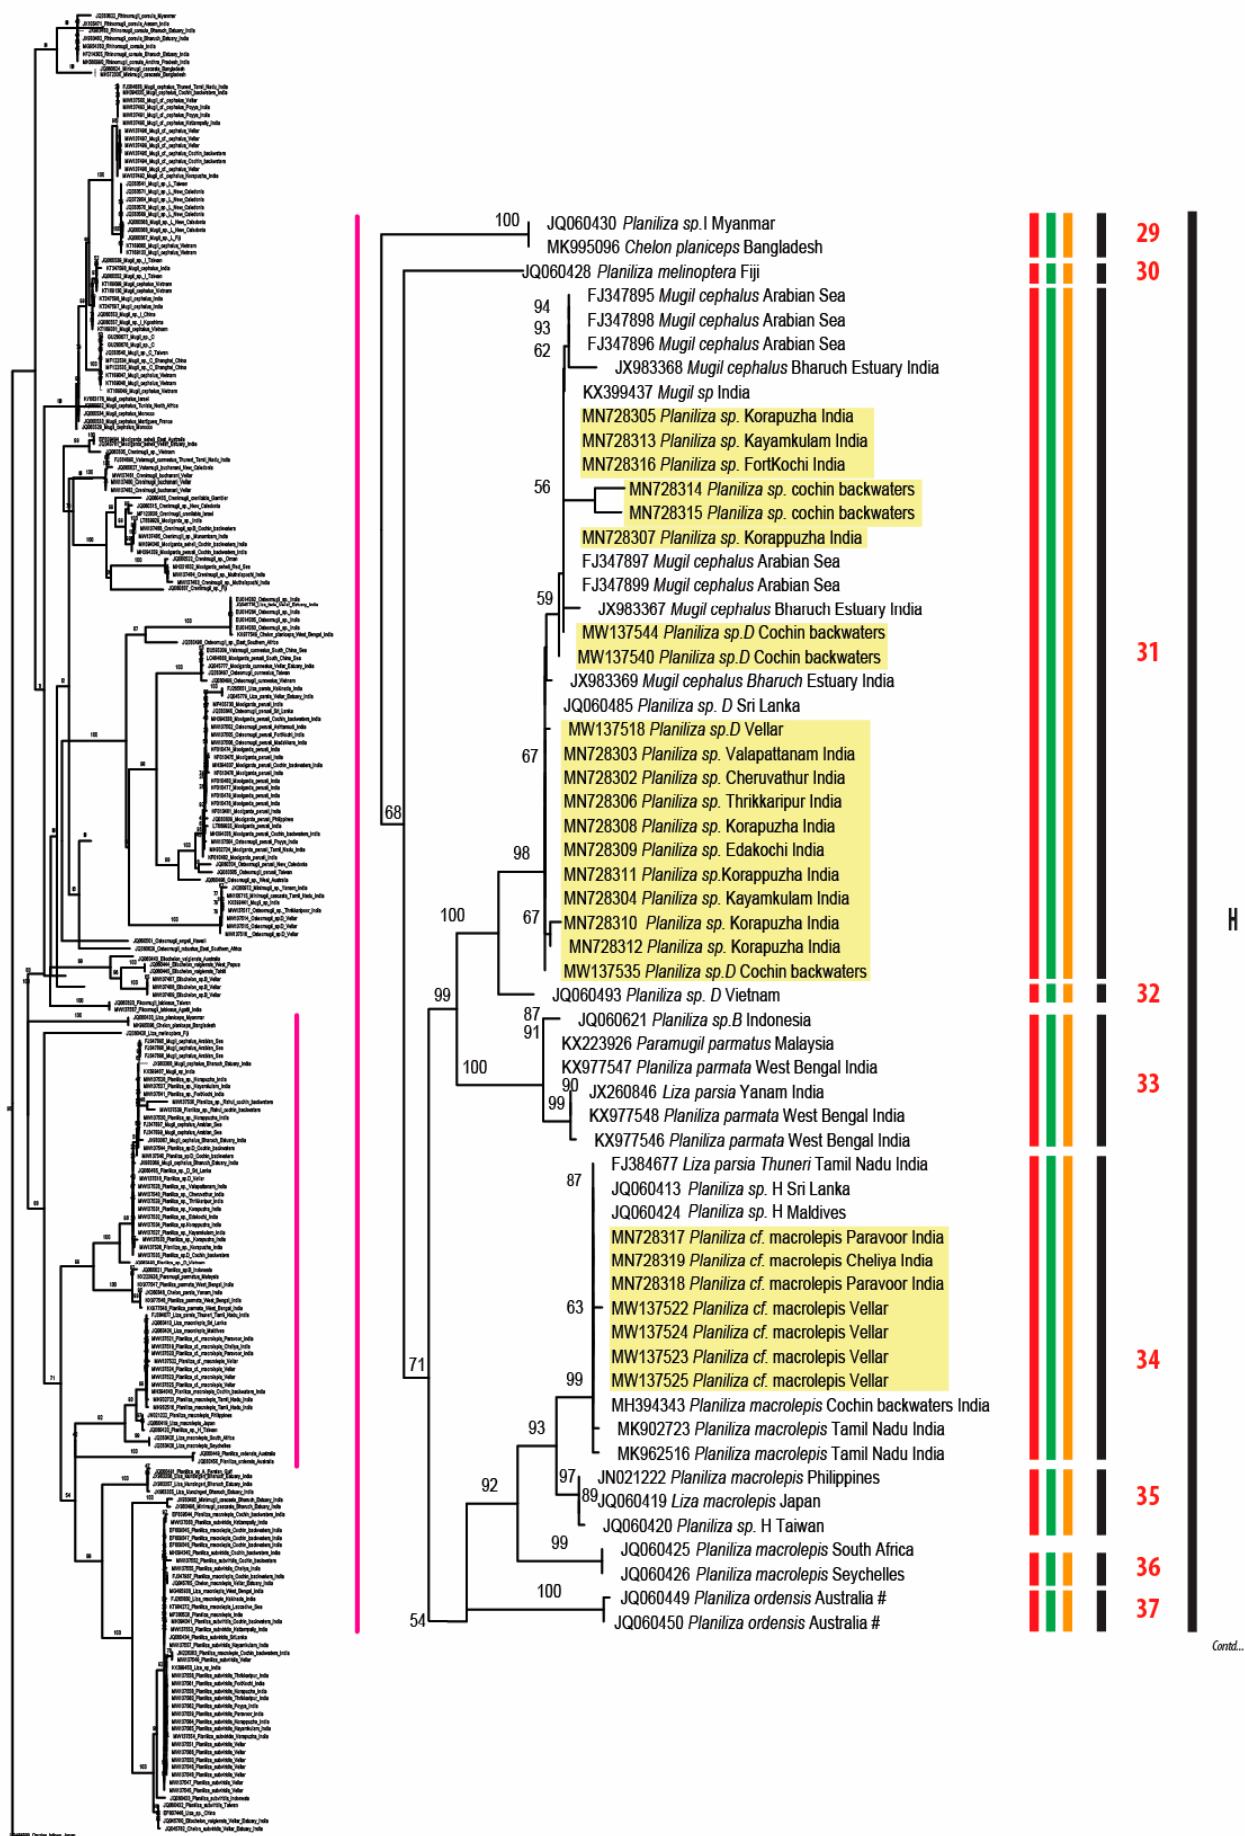

Contd...

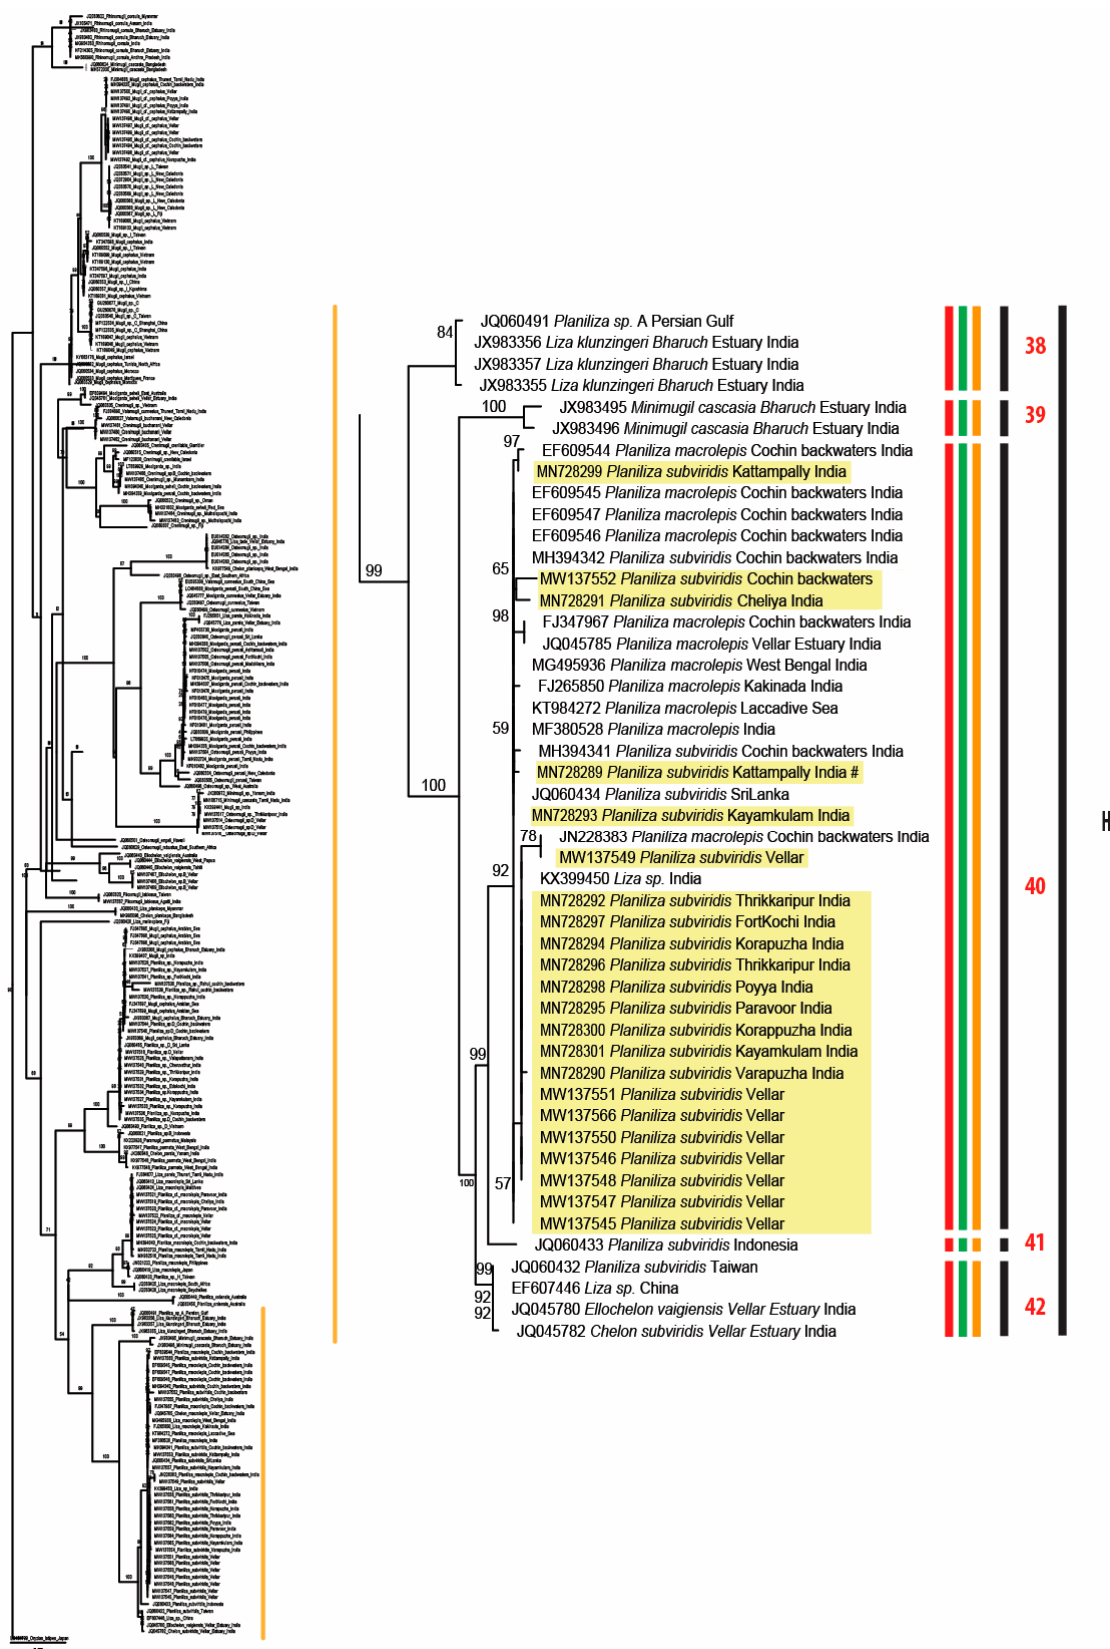

**Supplementary Figure S1.** Maximum likelihood phylogenetic tree of family Mugilidae from the Indo-Pacific and their species delimitation using ABGD, ASAP, and RESL (Arabic Numerals in red colour is the “species group” number mentioned in Supplementary Table 1. Newly generated sequences as part of the study are highlighted, Topotypic sequences of the ‘type-species’ is marked with “#”).

**Supplementary Table S2.** Details of topotypic and other reference sequences obtained from GenBank

| Species                                   | GenBank Accession number | Reference                           |
|-------------------------------------------|--------------------------|-------------------------------------|
| <i>Rhinomugil corsula</i>                 | JX105471                 | [80]                                |
| <i>Minimugil cascasia</i>                 | JQ060624                 | [7]                                 |
| <i>Mugil cephalus</i>                     | KY683176                 | [81]                                |
|                                           | JQ060529, JQ060532–34    | [7]                                 |
| <i>Crenimugil seheli</i> (Fabricius 1775) | MH331802                 | ANGBF37690-19 (BOLD record details) |
| <i>Crenimugil buechanani</i>              | JQ060627                 | [7]                                 |
| <i>Osteomugil cunnesius</i>               | JQ045777                 | [38]                                |
| <i>Osteomugil perusii</i>                 | JQ060504                 | [11]                                |
| <i>Ellochelon vaigiensis</i>              | JQ060444                 | [7]                                 |
| <i>Plicomugil labiosus</i>                | JQ060620                 | [7]                                 |
| <i>Planiliza ordensis</i>                 | JQ060449–50              | [82]                                |
| <i>Planiliza subviridis</i>               | JQ060432–33              | [9]                                 |
| <i>Planiliza macrolepis</i>               | JQ060425–26              | [11]                                |
| <i>Planiliza khunzingeri</i>              | JX983355–57              | [83]                                |

**Supplementary Table S3.** Discrepancies observed in morphological characters used in previous studies on Indian mullets

| Species                     | Character                         | Observation                                         | Reference |
|-----------------------------|-----------------------------------|-----------------------------------------------------|-----------|
| <i>Mugil cephalus</i>       | First dorsal fin origin           | “Not specific towards the snout tip and is varying” | [34]      |
|                             |                                   | “Nearer to snout tip than to caudal fin base”       | [62]      |
|                             | Lateral scale counts              | 38–43                                               | [33]      |
|                             |                                   | 37–42                                               | [34]      |
|                             |                                   | 43–45                                               | [84]      |
|                             |                                   | 39–42                                               | [61]      |
|                             | Transverse scale counts           | 13–15                                               | [34]      |
|                             |                                   | 14–15                                               | [84]      |
|                             |                                   | 12–14                                               | [61]      |
| <i>Planiliza macrolepis</i> | Adipose eyelids                   | Present                                             | [34]      |
|                             |                                   | Rudimentary and confined to the rim of the eye.     | [61]      |
|                             | Number of lateral scales          | 28–33                                               | [34]      |
|                             |                                   | 33–34                                               | [84]      |
|                             |                                   | 33–35                                               | [61]      |
|                             |                                   | 31–34                                               | [62]      |
|                             | Number of transverse scales       | 9–11                                                | [34]      |
|                             |                                   | 10–11                                               | [61]      |
|                             |                                   | 11–12                                               | [84]      |
|                             |                                   | 12                                                  | [85]      |
| <i>Osteomugil cunnesius</i> | Insertion of the first dorsal fin | Varying in relation to snout and base of caudal     | [34]      |

|                             |                                | Nearer to snout tip<br>than to caudal fin<br>base | [62]    |
|-----------------------------|--------------------------------|---------------------------------------------------|---------|
|                             | Number of lateral scale counts | 42–43                                             | [20,85] |
|                             |                                | 33–35                                             | [21]    |
|                             |                                | 33–38                                             | [34]    |
|                             |                                | 35–37                                             | [84]    |
|                             |                                | 31–34                                             | [61]    |
|                             |                                | 30–35                                             | [62]    |
|                             |                                | Curved                                            | [21]    |
| <i>Osteomugil speigleri</i> | Nature of pre-orbitals         | Straight                                          | [61,84] |
|                             |                                | 40                                                | [85]    |
|                             | Number of lateral scales       | 40–43                                             | [21,33] |
|                             |                                | 40–42                                             | [84]    |
|                             |                                | 37–39                                             | [61]    |
|                             |                                | 37–40                                             | [62]    |
|                             |                                | 41–49                                             | [33]    |
| <i>Crenimugil seheli</i>    | Number of lateral scales       | 35–38                                             | [34]    |
|                             |                                | 39–42                                             | [61]    |
|                             |                                | 38–42                                             | [62]    |
|                             |                                | 18–20                                             | [34]    |
|                             | Number of predorsal scales     | 19–21                                             | [84]    |
|                             |                                |                                                   |         |
